# Supplementary material for: Fatigue in patients with chronic disease: results from the population-based Lifelines Cohort Study
Source: PubMed Central journal article supplement (PMC8546086; doi:10.1038/s41598-021-00337-z), 2021-10-25
Supplement: 41598_2021_337_MOESM1_ESM.pdf [file 41598_2021_337_MOESM1_ESM.pdf]

## Online Supplement

### Fatigue in patients with chronic disease: results from the population-based Lifelines cohort study

Yvonne MJ Goërtz<sup>1,2,3\*</sup>, Annemarie MJ Braamse<sup>4</sup>, Martijn A Spruit<sup>1,2,3</sup>, Daisy JA Janssen<sup>1,5</sup>, Zjale Ebadi<sup>6</sup>, Maarten Van Herck<sup>1,2,3,7</sup>, Chris Burtin<sup>7</sup>, Jeannette B Peters<sup>8</sup>, Mirjam AG Sprangers<sup>4</sup>, Femke Lamers<sup>9</sup>, Jos WR Twisk<sup>10</sup>, Melissa SY Thong<sup>4</sup>, Jan H Vercoulen<sup>6</sup>, Suzanne E Geerlings<sup>11</sup>, Anouk W Vaes<sup>1</sup>, Rosanne JHCG Beijers<sup>2,3</sup>, Martijn van Beers<sup>2,3</sup>, Annemie MWJ Schols<sup>2,3</sup>, Judith GM Rosmalen<sup>12</sup>, Hans Knoop<sup>4</sup>

<sup>1</sup>Department of Research and Development, Ciro, Horn, the Netherlands

<sup>2</sup>NUTRIM School of Nutrition and Translational Research in Metabolism, Maastricht, the Netherlands

<sup>3</sup>Department of Respiratory Medicine, Maastricht University Medical Centre (MUMC+), Maastricht, the Netherlands

<sup>4</sup>Department of Medical Psychology, Amsterdam University Medical Centers, Amsterdam Public Health Research Institute, University of Amsterdam, Amsterdam, the Netherlands

<sup>5</sup>Department of Health Services Research, Care and Public Health Research Institute, Faculty of Health, Medicine and Life Sciences, Maastricht University, Maastricht, the Netherlands.

<sup>6</sup>Radboud university medical center, Radboud Institute for Health Sciences, Department of Medical Psychology, Nijmegen, The Netherlands.

<sup>7</sup>REVAL – Rehabilitation Research Center, BIOMED – Biomedical Research Institute, Faculty of Rehabilitation Sciences, Hasselt University, Diepenbeek, Belgium

<sup>8</sup>Radboud university medical center, Radboud Institute for Health Sciences, Department of Lung diseases, Nijmegen, The Netherlands.

<sup>9</sup>Amsterdam UMC, Vrije Universiteit, Department of Psychiatry, Amsterdam Public Health Research Institute, Amsterdam, the Netherlands

<sup>10</sup>Amsterdam UMC, Vrije Universiteit Amsterdam, Department of Epidemiology and Biostatistics, Amsterdam Public Health research institute, Amsterdam, the Netherlands

<sup>11</sup>Department of Internal Medicine, Amsterdam University Medical Centers, University of Amsterdam, Amsterdam, the Netherlands

<sup>12</sup>University of Groningen, University Medical Center Groningen, Departments of Psychiatry and Internal Medicine, Groningen, the Netherlands

\*Corresponding author

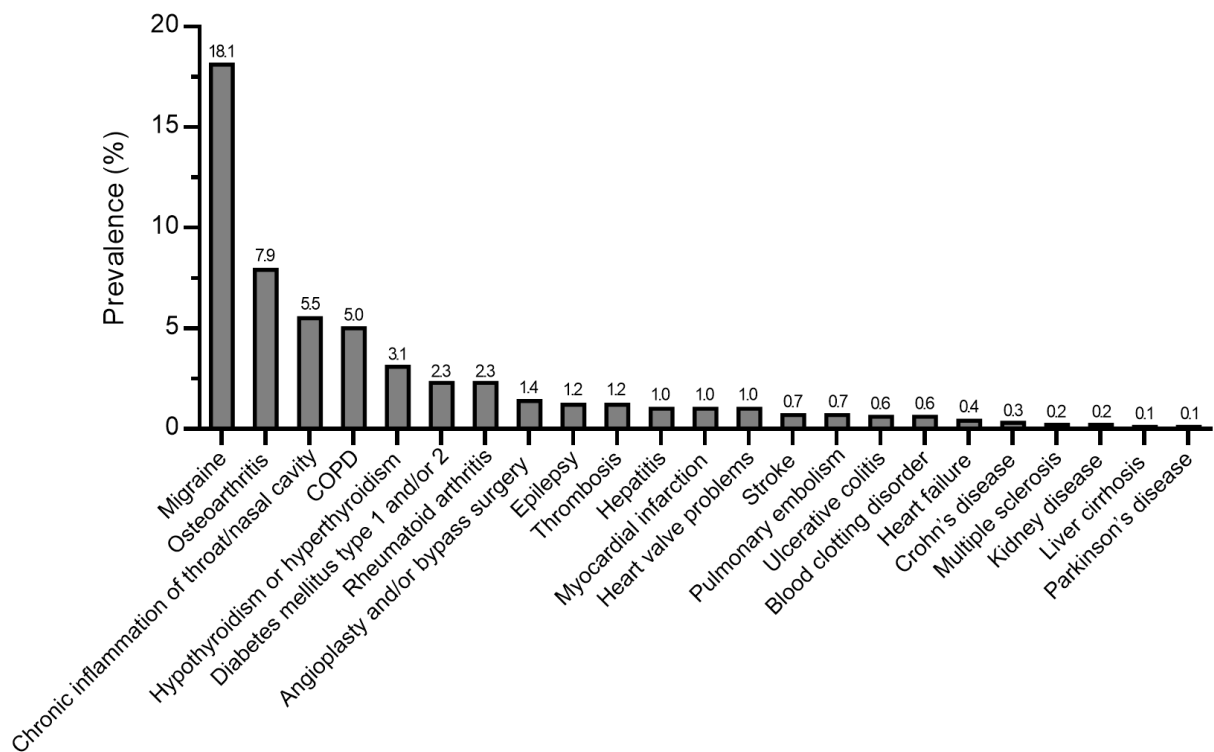

**Online Supplement Figure 1: Prevalence of chronic diseases in the total sample (n=78,363)**

Online Supplement Figure 1 presents the prevalence of chronic diseases in the sample. The most common chronic condition is migraine (18%), followed by osteoarthritis (8%), chronic inflammation of the throat/nasal cavity (6%), COPD (5%) and hypothyroidism or hyperthyroidism (3%). PD and liver cirrhosis were the least common disease in the cohort (0.1%). More than half (60%, n=47,324) of the total sample had no chronic disease, whereas 28% (n=22,293) had one chronic disease (single-morbidity) and 11% (n=8,746) had multiple chronic diseases concurrently.

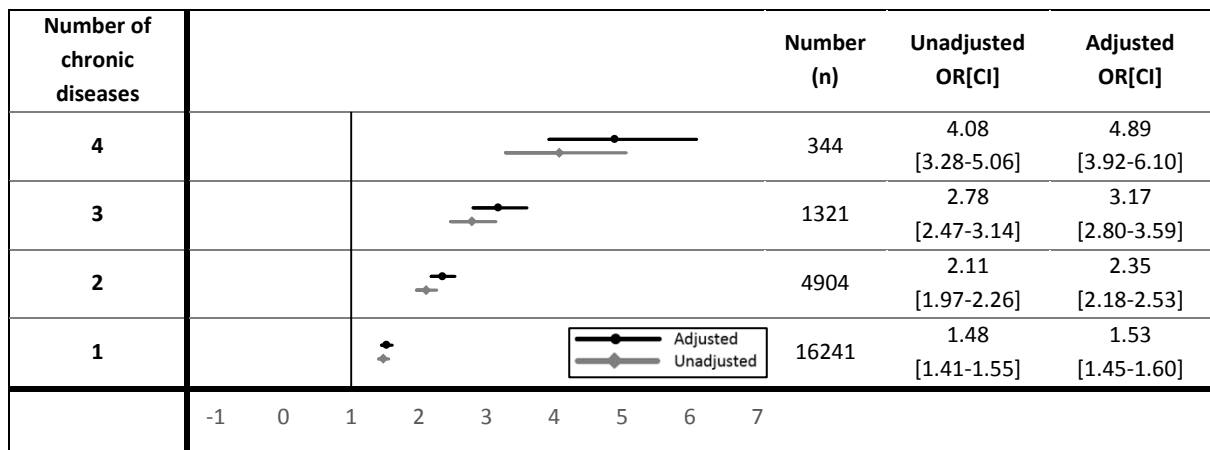

**Online Supplement Figure 2: Unadjusted and adjusted odds ratios and 95%CI of experiencing chronic fatigue for participants with one to four chronic diseases compared to participants without a chronic disease.** Reference = participants without a chronic disease. Adjusted odds ratio corrected for age and sex.

**Online Supplement Table 1: The trans-diagnostic or generic relationship between fatigue severity and the predisposing and associated factors**

| Trans-diagnostic <i>versus</i> generic model                                                     | Model A    |         | Model B            |                  | Model C          |                  |
|--------------------------------------------------------------------------------------------------|------------|---------|--------------------|------------------|------------------|------------------|
|                                                                                                  | F(df)      | p-value | F(df)              | p-value          | F(df)            | p-value          |
| <b>Chronic disease <i>versus</i> no chronic disease</b>                                          | 691.306(1) | <0.001  | 315.533(1)         | <0.001           | 4.642(1)         | 0.031            |
| <b>Sex</b>                                                                                       |            |         | <b>18.793(1)</b>   | <b>&lt;0.001</b> | 16.367(1)        | <0.001           |
| <b>Education level</b>                                                                           |            |         | <b>95.460(2)</b>   | <b>&lt;0.001</b> | 87.494(2)        | <0.001           |
| <b>Household composition</b>                                                                     |            |         | <b>27.479(4)</b>   | <b>&lt;0.001</b> | 21.760(4)        | <0.001           |
| Partner                                                                                          |            |         | 0.137(1)           | 0.712            | 0.064(1)         | 0.801            |
| <b>Work situation</b>                                                                            |            |         | <b>4.241(1)</b>    | <b>0.039</b>     | 0.852(1)         | 0.356            |
| <b>Smoking</b>                                                                                   |            |         | <b>28.555(1)</b>   | <b>&lt;0.001</b> | 21.295(1)        | <0.001           |
| <b>Depressive disorder</b>                                                                       |            |         | <b>1001.169(1)</b> | <b>&lt;0.001</b> | 938.841(1)       | <0.001           |
| <b>Anxiety disorder</b>                                                                          |            |         | <b>1392.900(1)</b> | <b>&lt;0.001</b> | 1267.694(1)      | <0.001           |
| <b>Bodily pain that hampers in performing activities</b>                                         |            |         | <b>1013.220(1)</b> | <b>&lt;0.001</b> | 988.351(1)       | <0.001           |
| <b>Leisure-time sports activities</b>                                                            |            |         | <b>827.905(1)</b>  | <b>&lt;0.001</b> | 761.893(1)       | <0.001           |
| <b>Age</b>                                                                                       |            |         | <b>771.708(1)</b>  | <b>&lt;0.001</b> | 644.277(1)       | <0.001           |
| <b>BMI</b>                                                                                       |            |         | <b>322.708(1)</b>  | <b>&lt;0.001</b> | 299.008(1)       | <0.001           |
| <b>Diastolic blood pressure</b>                                                                  |            |         | <b>5.073(1)</b>    | <b>0.024</b>     | 5.513(1)         | 0.019            |
| <b>Resting heart rate</b>                                                                        |            |         | <b>100.679(1)</b>  | <b>&lt;0.001</b> | 81.268(1)        | <0.001           |
| <b>Neuroticism facets of anger/hostility, self-consciousness, impulsivity, and vulnerability</b> |            |         | <b>3144.863(1)</b> | <b>&lt;0.001</b> | 2680.557(1)      | <0.001           |
| <b>No. of people in household</b>                                                                |            |         | <b>7.118(1)</b>    | <b>0.008</b>     | 6.136(1)         | 0.013            |
| Disease x Sex                                                                                    |            |         |                    |                  | 0.049(1)         | 0.825            |
| Disease x Education level                                                                        |            |         |                    |                  | 1.292(2)         | 0.275            |
| Disease x household composition                                                                  |            |         |                    |                  | 0.724(4)         | 0.575            |
| Disease x Partner                                                                                |            |         |                    |                  | 2.331(1)         | 0.127            |
| <b>Disease x Work situation</b>                                                                  |            |         |                    |                  | <b>12.515(1)</b> | <b>&lt;0.001</b> |
| Disease x Smoking                                                                                |            |         |                    |                  | 0.385(1)         | 0.535            |
| Disease x Depressive disorder                                                                    |            |         |                    |                  | 1.945(1)         | 0.163            |
| Disease x Anxiety disorder                                                                       |            |         |                    |                  | 1.295(1)         | 0.255            |
| Disease x Bodily pain that hampers in performing activities                                      |            |         |                    |                  | 0.086(1)         | 0.770            |
| <b>Disease x Leisure-time sports activities</b>                                                  |            |         |                    |                  | <b>6.367(1)</b>  | <b>0.012</b>     |
| Disease x Age                                                                                    |            |         |                    |                  | 1.806(1)         | 0.179            |
| Disease x BMI                                                                                    |            |         |                    |                  | 0.423(1)         | 0.515            |
| Disease x Diastolic blood pressure                                                               |            |         |                    |                  | 0.379(1)         | 0.538            |
| Disease x Resting heart rate                                                                     |            |         |                    |                  | 0.434(1)         | 0.510            |

|                                                                                                     |  |  |  |  |          |       |
|-----------------------------------------------------------------------------------------------------|--|--|--|--|----------|-------|
| Disease x Neuroticism facets of anger/hostility, self-consciousness, impulsivity, and vulnerability |  |  |  |  | 1.193(1) | 0.275 |
| Disease x No. of people in household                                                                |  |  |  |  | 0.184(1) | 0.668 |

*\* The factor 'chronic disease versus no chronic disease' reflects the participants with- and without chronic disease, coded as 0=no chronic disease, 1 = single-morbidity. Model A: explores the impact of the main effect of 'chronic disease versus no chronic disease' on fatigue severity. Model B: investigates the main effects of 'chronic disease versus no chronic disease' and the independent variables (predictors) on fatigue severity. Model C: studies the impact of the main effects plus the interaction effect between 'chronic disease versus no chronic disease' and the independent variables on fatigue severity. Abbreviations: no. = number; df = degrees of freedom, BMI = body mass index.*

**Online Supplement Table 2: Interaction effect results between the presence of a depressive- or anxiety disorder and fatigue**

|                                                    | Depression |                            |                          |                  | Anxiety |                            |                          |                  |
|----------------------------------------------------|------------|----------------------------|--------------------------|------------------|---------|----------------------------|--------------------------|------------------|
|                                                    | df         | Unstandardized Coefficient | Standardized coefficient | 95% CI           | df      | Unstandardized coefficient | Standardized coefficient | 95% CI           |
| COPD                                               | 1488       | 16.875                     | 0.306                    | 14.208 – 19.542* | 1488    | 12.257                     | 0.286                    | 10.167 – 14.348* |
| Blood clotting disorder                            | 132        | 13.074                     | 0.189                    | 1.308 – 24.841*  | 132     | 1.745                      | 0.050                    | -4.238 – 7.728   |
| Stroke                                             | 143        | 9.978                      | 0.196                    | 1.686 – 18.270*  | 143     | 1.640                      | 0.032                    | -6.812 – 10.091  |
| Angioplasty and/or bypass surgery                  | 158        | 17.013                     | 0.220                    | 5.106 – 28.920*  | 158     | 17.000                     | 0.308                    | 8.707 – 25.293*  |
| Ulcerative colitis                                 | 181        | 21.737                     | 0.342                    | 12.967 – 30.507* | 181     | 13.205                     | 0.235                    | 5.156 – 21.254*  |
| Thrombosis                                         | 215        | 18.236                     | 0.416                    | 12.865 – 23.607* | 215     | 11.970                     | 0.325                    | 7.276 – 16.665*  |
| Heart valve problems                               | 245        | 20.425                     | 0.429                    | 14.998 – 25.852* | 245     | 9.326                      | 0.202                    | 3.630 – 15.022*  |
| Hepatitis                                          | 294        | 23.215                     | 0.417                    | 17.404 – 29.027* | 294     | 16.482                     | 0.336                    | 11.177 – 21.786* |
| Epilepsy                                           | 387        | 15.058                     | 0.250                    | 9.210 – 20.906*  | 387     | 10.306                     | 0.246                    | 6.243 – 14.368*  |
| Rheumatoid arthritis                               | 546        | 18.726                     | 0.318                    | 14.027 – 23.425* | 546     | 13.117                     | 0.273                    | 9.228 – 17.006*  |
| Diabetes mellitus type 1 and/or 2                  | 597        | 17.786                     | 0.321                    | 13.566 – 22.007* | 597     | 12.639                     | 0.292                    | 9.308 – 15.970*  |
| Hypothyroidism or hyperthyroidism                  | 945        | 17.118                     | 0.290                    | 13.514 – 20.722* | 945     | 14.227                     | 0.296                    | 11.298 – 17.156* |
| Chronic inflammation of throat and/or nasal cavity | 1731       | 13.677                     | 0.260                    | 11.280 – 16.075* | 1731    | 12.176                     | 0.333                    | 10.533 – 13.800* |
| Osteoarthritis                                     | 2356       | 18.289                     | 0.309                    | 16.010 – 20.567* | 2356    | 13.663                     | 0.296                    | 11.882 – 15.444* |
| Migraine                                           | 8224       | 16.302                     | 0.302                    | 15.190 – 17.414* | 8224    | 12.440                     | 0.325                    | 11.658 – 13.222* |

Abbreviations: df = degrees of freedom; CI = Confidence Interval. \*Asteriks indicates a p≤0.05.

**Online Supplement Table 3: Binary logistic regressions**

|                                                                                           | <i>Model A</i><br><i>Severe fatigue</i><br><i>Included cases: 18,513</i> |                | <i>Model B</i><br><i>Chronic fatigue</i><br><i>Included cases: 14,246</i> |                |
|-------------------------------------------------------------------------------------------|--------------------------------------------------------------------------|----------------|---------------------------------------------------------------------------|----------------|
|                                                                                           | <b>OR[95%CI]</b>                                                         | <b>p-value</b> | <b>OR[95%CI]</b>                                                          | <b>p-value</b> |
| Chronic disease                                                                           | 1.62[1.49-1.76]                                                          | <0.001         | 1.54[1.40-1.69]                                                           | <0.001         |
| Female gender                                                                             | 1.10[1.00-1.20]                                                          | 0.05           | 0.91[0.82-1.01]                                                           | 0.07           |
| Age                                                                                       | 0.98[0.97-0.98]                                                          | <0.001         | 0.98[0.98-0.99]                                                           | <0.001         |
| Nr. of people in a household                                                              | 0.96[0.90-1.02]                                                          | 0.20           | 0.98[0.92-1.05]                                                           | 0.63           |
| Education MIDDLE                                                                          | 1.14[1.01-1.28]                                                          | 0.03           | 1.08[0.95-1.23]                                                           | 0.24           |
| Education HIGH                                                                            | 1.35[1.19-1.54]                                                          | <0.001         | 1.21[1.04-1.40]                                                           | 0.01           |
| Partner                                                                                   | 0.99[0.67-1.45]                                                          | 0.94           | 1.08[0.71-1.65]                                                           | 0.72           |
| BMI                                                                                       | 1.04[1.03-1.05]                                                          | <0.001         | 1.03[1.02-1.04]                                                           | <0.001         |
| DBP                                                                                       | 1.00[0.99-1.00]                                                          | 0.02           | 0.99[0.99-1.00]                                                           | 0.02           |
| Resting heart rate                                                                        | 1.01[1.01-1.01]                                                          | <0.001         | 1.01[1.00-1.01]                                                           | <0.001         |
| Work situation                                                                            | 0.83[0.76-0.91]                                                          | <0.001         | 0.70[0.63-0.78]                                                           | <0.001         |
| Smoking status                                                                            | 1.07[0.96-1.18]                                                          | 0.23           | 0.99[0.88-1.11]                                                           | 0.85           |
| Neuroticism facets of anger/hostility, self-consciousness, impulsivity, and vulnerability | 1.13[1.12-1.15]                                                          | <0.001         | 1.09[1.08-1.11]                                                           | <0.001         |
| Depressive disorder                                                                       | 3.88[3.28-4.59]                                                          | <0.001         | 2.74[2.33-3.23]                                                           | <0.001         |
| Anxiety disorder                                                                          | 2.94[2.61-3.31]                                                          | <0.001         | 2.34[2.07-2.64]                                                           | <0.001         |
| Sports                                                                                    | 0.58[0.54-0.63]                                                          | <0.001         | 0.55[0.51-0.60]                                                           | <0.001         |
| Bodily pain that hampers in performing activities                                         | 4.14[3.59-4.78]                                                          | <0.001         | 3.10[2.67-3.61]                                                           | <0.001         |
| Couple without children                                                                   | 0.87[0.58-1.29]                                                          | 0.48           | 0.94[0.60-1.45]                                                           | 0.77           |
| Couple with children                                                                      | 1.03[0.67-1.57]                                                          | 0.91           | 1.06[0.66-1.69]                                                           | 0.82           |
| Single parent                                                                             | 1.38[1.10-1.72]                                                          | 0.01           | 1.26[0.98-1.61]                                                           | 0.07           |
| Other household composition                                                               | 0.79[0.57-1.09]                                                          | 0.15           | 0.85[0.59-1.23]                                                           | 0.38           |

\* *Model A: dependent factor yes/no severe fatigue. Model B: dependent factor yes/no chronic fatigue. The independent factor “chronic disease” includes participants with single-morbidity versus multi-morbidity. Abbreviations: OR = Odds Ratio; CI = Confidence Interval; Nr. = number; BMI = Body Mass Index; DBP = Diastolic Blood Pressure.*
